# Supplementary material
Source: PubMed Central journal article supplement (PMC3111299)
Supplement: 1100981108_pnas.201100981SI.pdf [file 1100981108_pnas.201100981SI.pdf]

PNAS

Normand et al. [www.pnas.org/cgi/content/short/1100981108](http://www.pnas.org/cgi/content/short/1100981108)

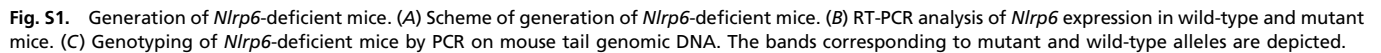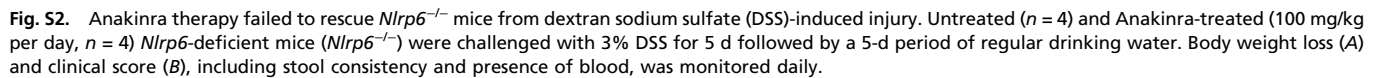

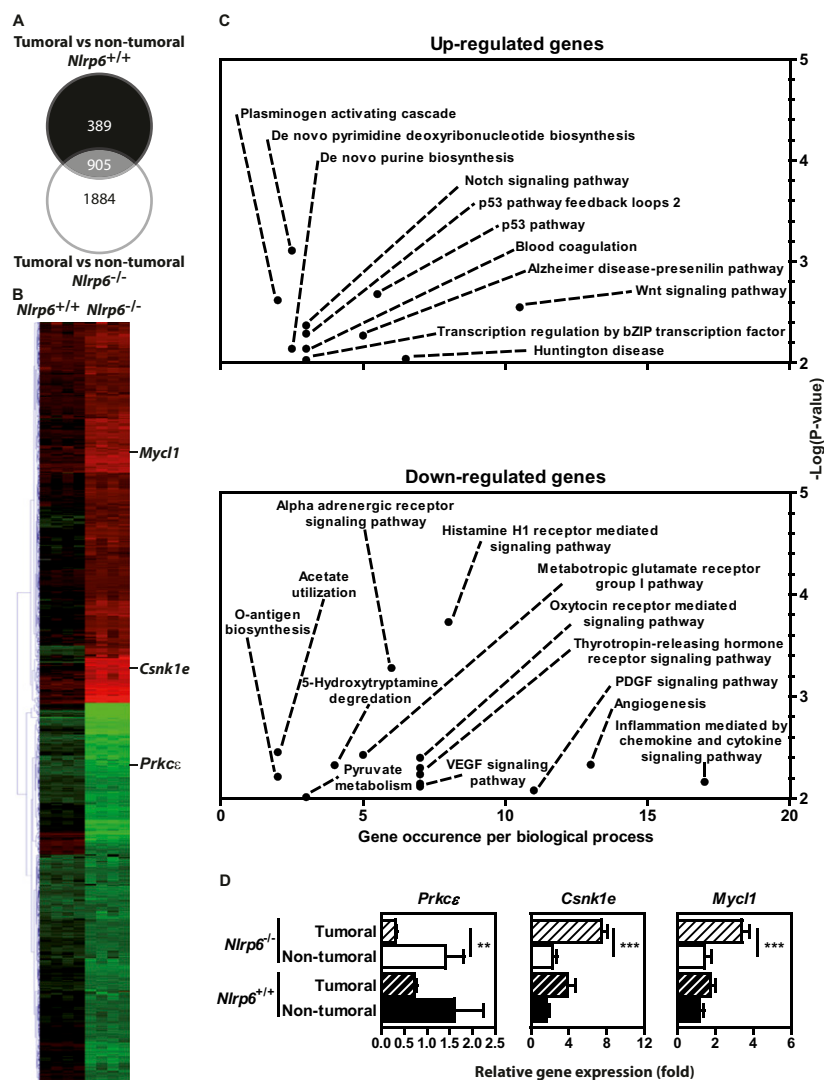

**Fig. S3.** Intestinal tumorigenesis induces an abnormal transcriptional response in *Nlrp6*-deficient mice. Venn diagram is depicted (A) after transcriptional profiling of tumoral (T) and nontumoral (NT) biopsies from two wild-type and two *Nlrp6*-deficient mice (B). (C) Gene ontology analysis on up- and down-regulated genes that are differentially expressed in *Nlrp6*-deficient mice, as described in *Materials and Methods*. (D) Relative gene expression on tumoral (T) and nontumoral (NT) colonic specimens were determined by quantitative RT-PCR analysis. \*\* $P < 0.01$ , \*\*\* $P < 0.001$ .

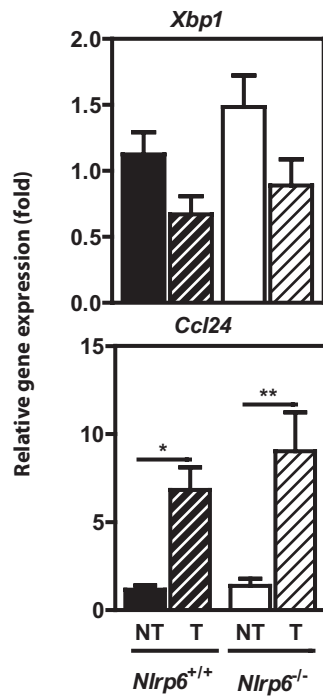

**Fig. S4.** Enhanced tumoral expression of *Ccl24* and *Xbp1* independently of NLRP6. Relative gene expression on tumoral (T) and nontumoral (NT) colonic specimens ( $n = 8$ ) were determined by quantitative RT-PCR analysis. \* $P < 0.05$ , \*\* $P < 0.01$ .
